# Supplementary material for: Changes in the VOC of Fruits at Different Refrigeration Stages of ‘Ruixue’ and the Participation of Carboxylesterase MdCXE20 in the Catabolism of Volatile Esters
Source: MDPI journal article supplement (doi:10.3390/foods12101977), 2023-05-12
Supplement: s1 [file s1]

# Supplementary Material

Table S1. Schedule Change of volatile substance content during storage period of ‘Ruixue’ apples (μg/kg)

| Compound                                      | Content (μg/kg) |               |               |               |               |               |
|-----------------------------------------------|-----------------|---------------|---------------|---------------|---------------|---------------|
|                                               | 0 d             | 30 d          | 60 d          | 90 d          | 120 d         | 150 d         |
| Butanoic acid, propyl ester                   | -               | 37.641±2.75   | 169.848±10.45 | 106.734±8.09  | 122.217±8.34  | 181.196±6.35  |
| Butanoic acid, 2-methyl-, propyl ester        | 12.384±0.53     | 17.508±1.05   | 45.741±3.89   | 24.084±2.12   | 24.531±2.45   | 35.298±2.67   |
| Butanoic acid, butyl ester                    | 39.408±1.98     | 199.765±9.89  | 649.924±30.56 | 297.675±16.89 | 432.294±20.24 | 497.244±25.13 |
| Butanoic acid, 2-methylbutyl ester            | 22.822±1.34     | 53.804±2.19   | 95.473±4.45   | 54.521±1.94   | 77.201±5.23   | 69.996±4.37   |
| Acetic acid, hexyl ester                      | 13.905±0.56     | 74.378±2.75   | 257.919±10.72 | 91.221±5.19   | 22.811±1.93   | 54.044±4.37   |
| Butanoic acid, 2-methyl-, 2-methylbutyl ester | 61.778±4.95     | 59.348±2.56   | 58.430±2.87   | 31.726±3.22   | 27.002±1.05   | 33.146±1.64   |
| Butanoic acid, pentyl ester                   | 17.588±0.56     | 69.941±3.82   | 144.401±10.30 | 84.155±4.74   | 125.896±9.04  | 160.138±12.05 |
| Butanoic acid, 2-methyl-, pentyl ester        | 74.402±5.90     | 90.778±6.07   | 99.04±4.96    | 68.079±2.89   | 33.673±0.45   | 80.405±2.72   |
| Propanoic acid, hexyl ester                   | 91.156±6.16     | 144.670±9.11  | 476.165±45.09 | 300.508±23.18 | 208.574±15.21 | 263.932±17.38 |
| Hexanoic acid, butyl ester                    | 37.100±2.67     | 472.599±18.02 | 790.549±59.40 | 626.144±42.61 | 489.860±39.02 | -             |
| Butanoic acid, hexyl ester                    | 172.956±10.41   | 964.571±79.90 | 1697.36±104.4 | 1571.19±102.5 | 1811.85±99.34 | 3033.50±210.2 |
| Butanoic acid, 2-methyl-, hexyl ester         | 1230.16±98.94   | 2139.61±156.5 | 2361.48±112.7 | 2650.63±145.8 | 2047.45±134.2 | 3269.33±211.9 |
| Hexanoic acid, 2-methylbutyl ester            | 25.740±1.78     | 112.423±10.13 | 194.504±12.45 | -             | -             | -             |
| Hexanoic acid, pentyl ester                   | -               | 161.167±10.17 | 245.505±5.94  | -             | 262.17±16.27  | -             |
| Hexanoic acid, hexyl ester                    | 130.478±9.06    | 1140.33±67.90 | 1602.41±92.91 | 358.557±29.45 | 2058.35±153.9 | 462.706±27.81 |
| Hexyl tiglate                                 | 52.665±3.19     | 10.823±0.78   | 39.226±1.70   | 77.418±5.39   | 66.459±5.41   | 108.992±29.08 |
| Octanoic acid, hexyl ester                    | -               | 36.419±1.41   | 55.455±4.18   | 121.261±10.12 | 82.820±5.06   | 128.180±8.23  |
| Butanoic acid, ethyl ester                    | -               | -             | 35.690±3.75   | 25.546±1.49   | 31.015±1.58   | 51.056±5.03   |
| Propanoic acid, butyl ester                   | -               | -             | 92.674±4.29   | 28.561±2.16   | 20.694±4.28   | 24.695±1.95   |
| Propanoic acid, hexyl ester                   | -               | 27.170±1.74   | -             | -             | -             | -             |
| Propanoic acid, pentyl ester                  | -               | 13.638±0.83   | 53.644±3.47   | -             | -             | -             |
| Butanoic acid, 2-methylpropyl ester           | -               | -             | -             | -             | 19.755±1.05   | 23.329±0.95   |
| Hexanoic acid, propyl                         | -               | -             | 73.457±2.75   | 66.754±6.64   | 69.340±4.38   | 116.089±10.9  |
| 6-Octen-1-ol, 3,7-dimethyl-, formate          | -               | 20.458±0.73   | 35.590±2.96   | 31.278±1.28   | -             | -             |

Compound

Content (μg/kg)

|                                        | 0 d             | 30 d            | 60 d            | 90 d            | 120 d           | 150 d           |
|----------------------------------------|-----------------|-----------------|-----------------|-----------------|-----------------|-----------------|
| Hexadecane, 1,1-bis(dodecyloxy)-       | -               | -               | 23.433 ± 0.69   | -               | -               | -               |
| Hexanal                                | 106.327 ± 5.62  | 268.722 ± 10.73 | 713.606 ± 57.81 | 483.448 ± 39.20 | 620.856 ± 48.88 | 793.972 ± 66.31 |
| 2-Hexenal, (E)-                        | -               | 38.902 ± 1.51   | 66.199 ± 3.36   | -               | 31.822 ± 3.09   | 27.121 ± 1.72   |
| 2-Hexenal                              | 1022.57 ± 78.19 | 1570.15 ± 139.9 | 2553.39 ± 185.3 | 1423.94 ± 109.9 | 1432.23 ± 103.3 | 1303.29 ± 99.41 |
| Octanal                                | -               | -               | 19.185 ± 0.94   | 174.30 ± 13.56  | 202.631 ± 19.58 | 137.563 ± 13.31 |
| 2-Heptenal, (Z)-                       | -               | 28.503 ± 2.05   | 36.425 ± 2.19   | 34.972 ± 3.08   | 22.061 ± 1.07   | -               |
| Nonanal                                | 56.753 ± 5.48   | 54.291 ± 4.93   | 151.055 ± 55.04 | 36.867 ± 2.27   | 55.073 ± 3.88   | 44.798 ± 2.75   |
| 2-Octenal, (E)-                        | 20.442 ± 0.79   | 34.678 ± 1.20   | 61.586 ± 4.17   | 43.260 ± 3.61   | 45.861 ± 3.36   | 24.010 ± 1.38   |
| 2,4-Heptadienal, (E,E)-                | -               | 23.660 ± 0.54   | -               | -               | -               | -               |
| Decanal                                | 39.688 ± 2.67   | 44.529 ± 3.27   | 118.928 ± 69.41 | 54.168 ± 3.69   | 50.501 ± 3.48   | -               |
| 2-Nonenal, (Z)-                        | 24.379 ± 0.62   | 63.101 ± 3.55   | 106.472 ± 68.11 | 55.941 ± 4.01   | 68.254 ± 6.17   | 92.525 ± 5.99   |
| 1-Butanol, 2-methyl-                   | -               | 103.433 ± 9.43  | 251.317 ± 21.39 | 295.571 ± 21.14 | 193.477 ± 16.74 | 251.074 ± 16.15 |
| 1-Pentanol                             | -               | -               | 23.216 ± 0.47   | 33.259 ± 12.21  | 24.754 ± 15.49  | 30.755 ± 3.99   |
| 2-Heptenal, (Z)-                       | 40.829 ± 2.11   | 382.891 ± 12.67 | 781.407 ± 45.85 | 996.576 ± 33.72 | 936.723 ± 58.83 | 1093.42 ± 99.31 |
| 13-Heptadecyn-1-ol                     | 11.942 ± 0.69   | -               | 20.435 ± 0.57   | -               | -               | -               |
| 5-Hepten-2-ol, 6-methyl-               | -               | -               | -               | 260.248 ± 19.88 | 155.724 ± 13.11 | 450.005 ± 39.98 |
| 1-Butanol                              | -               | 82.988 ± 65.03  | 208.871 ± 11.23 | 239.291 ± 11.59 | 142.188 ± 11.84 | 184.115 ± 8.41  |
| 1-Octen-3-one                          | 12.164 ± 0.99   | 11.889 ± 0.34   | 39.745 ± 1.27   | 18.338 ± 0.23   | 16.871 ± 0.64   | 15.414 ± 0.34   |
| 5-Hepten-2-one, 6-methyl-              | 22.796 ± 1.91   | 139.391 ± 8.10  | 180.899 ± 1.14  | 329.364 ± 14.62 | 298.578 ± 26.33 | 119.949 ± 9.37  |
| Tetradecane                            | -               | 11.289 ± 0.44   | -               | -               | -               | 17.206 ± 0.58   |
| p-Xylene                               | 12.268 ± 0.26   | 37.326 ± 1.55   | -               | -               | 51.977 ±        | 16.365 ±        |
| cis- $\alpha$ -Farnesene               | 15.868 ± 0.82   | 98.499 ± 4.99   | 59.267 ± 2.01   | 86.118 ± 5.34   | 81.745 ± 7.19   | 66.770 ± 4.74   |
| trans- $\alpha$ -Bergamotene           | 388.427 ± 29.35 | 541.361 ± 36.11 | 1301.80 ± 87.59 | 269.162 ± 19.19 | 2051.86 ± 176.7 | -               |
| $\alpha$ -Farnesene                    | 914.003 ± 59.37 | 8219.12 ± 452.5 | 2563.11 ± 115.1 | 613.205 ± 49.33 | 2283.07 ± 167.3 | 10303.4 ± 893   |
| Estragole                              | 19.868 ± 0.36   |                 | 31.899 ± 1.33   | -               | -               | -               |
| cis-Thujopsene                         | 18.987 ± 1.87   | -               | 72.968 ± 4.59   | 126.281 ± 9.79  | 89.621 ± 6.40   | 92.208 ± 8.19   |
| Butanoic acid, 2-methyl-, heptyl ester | -               | 14.609 ± 0.94   | 19.642 ± 0.96   | 19.071 ± 1.18   | 22.349 ± 1.54   | 37.618 ± 2.66   |

Note: Values are means  $\pm$  standard error of three biological replicates; - no such substance has been detected.

Table S2. Predicted properties of different carboxylesterases characterized in plants and of the intracellular locus of the proteins on websites.

| Gene name      | Gene name    | Chromosome | Size/aa | Length of CDS/kp | Subcellular localization | <i>pI</i> | Protein W |
|----------------|--------------|------------|---------|------------------|--------------------------|-----------|-----------|
| <i>MdCXE3</i>  | MD02G1275900 | 2          | 1011    | 698              | cytoplasm                | 5.04      | 83705.47  |
| <i>MdCXE5</i>  | MD02G1276600 | 2          | 1002    | 656              | cytoplasm                | 5.05      | 83055.26  |
| <i>MdCXE6</i>  | MD03G1273300 | 3          | 1041    | 560              | cytoplasm                | 5.04      | 85577.45  |
| <i>MdCXE9</i>  | MD05G1076400 | 5          | 975     | 782              | cytoplasm                | 5.08      | 80633.09  |
| <i>MdCXE10</i> | MD05G1078900 | 5          | 999     | 680              | cytoplasm                | 5.08      | 82941.45  |
| <i>MdCXE12</i> | MD05G1191100 | 5          | 960     | 588              | endoplasmic reticulum    | 5.08      | 78325.40  |
| <i>MdCXE17</i> | MD08G1226300 | 8          | 1094    | 552              | endoplasmic reticulum    | 5.02      | 91200.72  |
| <i>MdCXE20</i> | MD10G1068500 | 10         | 1023    | 549              | cytoplasm                | 5.01      | 85350.25  |
| <i>MdCXE23</i> | MD10G1091200 | 10         | 1116    | 560              | endoplasmic reticulum    | 5.05      | 92593.40  |
| <i>MdCXE25</i> | MD10G1091900 | 10         | 939     | 527              | endoplasmic reticulum    | 5.08      | 77709.78  |

Table S3. Apple genome names corresponding to 42 MdCXE members

| Name           | Apple ID     | Name           | Apple ID     | Name           | Apple ID     |
|----------------|--------------|----------------|--------------|----------------|--------------|
| <i>MdCXE1</i>  | MD02G1198400 | <i>MdCXE2</i>  | MD02G1198500 | <i>MdCXE3</i>  | MD02G1275900 |
| <i>MdCXE4</i>  | MD02G1276300 | <i>MdCXE5</i>  | MD02G1276600 | <i>MdCXE6</i>  | MD03G1273300 |
| <i>MdCXE7</i>  | MD04G1212400 | <i>MdCXE8</i>  | MD05G1060700 | <i>MdCXE9</i>  | MD05G1076400 |
| <i>MdCXE10</i> | MD05G1078900 | <i>MdCXE11</i> | MD05G1191000 | <i>MdCXE12</i> | MD05G1191100 |
| <i>MdCXE13</i> | MD06G1052300 | <i>MdCXE14</i> | MD07G1043400 | <i>MdCXE15</i> | MD07G1046000 |
| <i>MdCXE16</i> | MD08G1104000 | <i>MdCXE17</i> | MD08G1226300 | <i>MdCXE18</i> | MD09G1017600 |
| <i>MdCXE19</i> | MD09G1086100 | <i>MdCXE20</i> | MD10G1068500 | <i>MdCXE21</i> | MD10G1091000 |
| <i>MdCXE22</i> | MD10G1091100 | <i>MdCXE23</i> | MD10G1091200 | <i>MdCXE24</i> | MD10G1091600 |
| <i>MdCXE25</i> | MD10G1091900 | <i>MdCXE26</i> | MD11G1176900 | <i>MdCXE27</i> | MD11G1191000 |
| <i>MdCXE28</i> | MD11G1296000 | <i>MdCXE29</i> | MD12G1046500 | <i>MdCXE30</i> | MD12G1227200 |
| <i>MdCXE31</i> | MD13G1108800 | <i>MdCXE32</i> | MD13G1187400 | <i>MdCXE33</i> | MD13G1187500 |
| <i>MdCXE34</i> | MD13G1187900 | <i>MdCXE35</i> | MD14G1045500 | <i>MdCXE36</i> | MD15G1085200 |
| <i>MdCXE37</i> | MD15G1124600 | <i>MdCXE38</i> | MD16G1045600 | <i>MdCXE39</i> | MD16G1188100 |
| <i>MdCXE40</i> | MD16G1188500 | <i>MdCXE41</i> | MD17G1018400 | <i>MdCXE42</i> | MD00G1203100 |

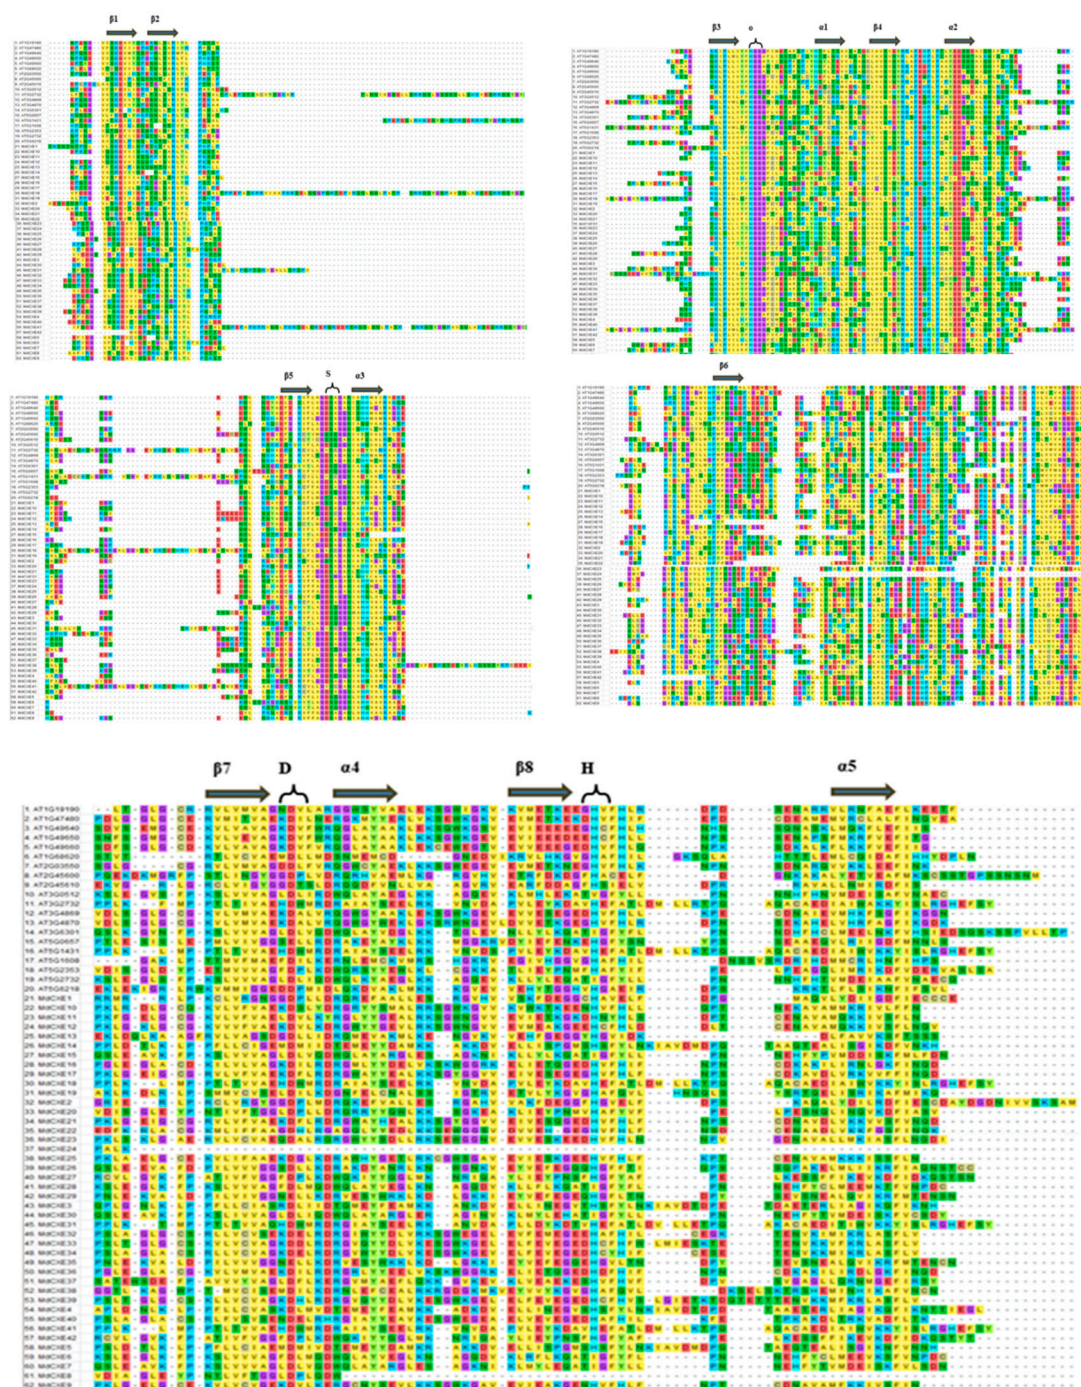

**Figure S1.** Multiple sequence alignment of CXE gene family in apple and *Arabidopsis thaliana*. The *MdCXEs*  $\alpha/\beta$  hydrolase predicted domain is highlighted in(➡). Putative residues constituting the catalytic triad (Ser/Thr, Asp, and His) are denoted is marked.
